# Supplementary material for: Pilot Study for the Dietary Assessment of Xenobiotics Derived from Food Processing in an Adult Spanish Sample
Source: MDPI journal article supplement (doi:10.3390/foods11030470), 2022-02-05
Supplement: s1 [file s1]

**Supplementary Table S1.** Description of mean daily xenobiotic intake in the study sample, by gender.

| Xenobiotic intake                                    | Total<br>(N=70)      | Gender               |                      |
|------------------------------------------------------|----------------------|----------------------|----------------------|
|                                                      |                      | Male<br>(N=25)       | Female<br>(N=45)     |
| <b>Heterocyclic amines<br/>(ng/day)</b>              |                      |                      |                      |
| AαC                                                  | 0.02 ± 0.09 (7)      | 0.01 ± 0.03 (2)      | 0.02 ± 0.11 (5)      |
| IQ                                                   | 0.14 ± 0.14 (47)     | 0.13 ± 0.13 (16)     | 0.14 ± 0.15 (31)     |
| MeIQ                                                 | 1.58 ± 1.58 (56)     | 1.59 ± 1.27 (21)     | 1.57 ± 1.75 (35)     |
| MeIQx                                                | 29.48 ± 27.85 (69)   | 30.13 ± 30.24 (25)   | 29.14 ± 26.78 (44)   |
| DiMeIQx                                              | 8.18 ± 7.96 (65)     | 8.71 ± 7.51 (23)     | 7.88 ± 8.27 (42)     |
| PhIP                                                 | 187.59 ± 257.04 (70) | 221.15 ± 326.16 (25) | 168.95 ± 211.15 (45) |
| <b>Polycyclic aromatic<br/>hydrocarbons (µg/day)</b> |                      |                      |                      |
| B(a)P                                                | 0.03 ± 0.03 (69)     | 0.03 ± 0.02 (25)     | 0.03 ± 0.03 (44)     |
| DiB(a)A                                              | 0.07 ± 0.10 (64)     | 0.11 ± 0.15 (24)     | 0.04 ± 0.06 (40)*    |
| Total PAHs                                           | 5.04 ± 3.84 (70)     | 5.01 ± 3.99 (25)     | 5.06 ± 3.81 (45)     |
| <b>Nitrates, nitrites and<br/>nitroso compounds</b>  |                      |                      |                      |
| Nitrates (mg/day)                                    | 126.01 ± 97.86 (70)  | 101.58 ± 73.40 (25)  | 139.59 ± 107.47 (45) |
| Nitrites (mg/day)                                    | 3.14 ± 2.90 (70)     | 2.67 ± 1.64 (25)     | 3.39 ± 3.39 (45)     |
| NDMA (µg/day)                                        | 0.17 ± 0.14 (69)     | 0.17 ± 0.11 (25)     | 0.17 ± 0.16 (44)     |
| NPIP (µg/day)                                        | 0.09 ± 0.09 (67)     | 0.07 ± 0.05 (25)     | 0.10 ± 0.11 (42)     |
| NPYR (µg/day)                                        | 0.15 ± 0.16 (68)     | 0.12 ± 0.08 (25)     | 0.16 ± 0.19 (43)     |
| Comb. (ng/day)                                       | 1.71 ± 5.10 (9)      | 2.40 ± 6.63 (4)      | 1.33 ± 4.05 (5)      |
| <b>Acrylamide (µg/day)</b>                           | 15.12 ± 11.60 (70)   | 18.36 ± 13.90 (25)   | 13.33 ± 9.82 (45)    |

Values are presented as mean ± standard deviation and number of consumers (n). (\*) Significant differences were found between genders (*p* value < 0.05). *T*-test analysis with Bonferroni correction was performed (*p* value < 0.05). AαC, amino-α-carboline; IQ, 2-amino-3-methylimidazo (4,5,f) quinoline; MeIQ, 2-amino-3,4 dimethylimidazo (4,5,f) quinoline; MeIQx, 2-amino-3,8 dimethylimidazo (4,5,f) quinoxaline; DiMeIQx, 2-amino-3,4,8 trimethylimidazo (4,5,f) quinoxaline; PhIP, 2-amino-1-methyl-6-phenylimidazo (4,5,b) pyridine; B(a)P, benzo (a) pyrene; DiB(a)A, dibenzo (a) anthracene; Total PAHs, Total polycyclic aromatic hydrocarbons; NDMA, N-nitrosodimethylamine; NPIP, N-Nitrosopiperidine; NPYR, N-Nitrosopyrrolidine; Comb., Combined nitroso compounds.
